# Supplementary material for: Synthesis of curly graphene nanoribbon/polyaniline/MnO2 composite and its application in supercapacitor
Source: Royal Society of Chemistry journal article supplement (doi:10.1039/c6ra02777f), 2016-01-01
Supplement: c6ra02777f1.pdf [file c6ra02777f1.pdf]

Electronic Supplementary Information (ESI)

**Synthesis of Curly Graphene Nanoribbon/Polyaniline/MnO<sub>2</sub>  
Composite and Its Application in Supercapacitor**

*Zhixiong Yin<sup>a,b</sup>, Haihui Zhou<sup>\*a,b</sup>, Chaopeng Fu<sup>a,b</sup>, Ningshuang Zhang<sup>a,b</sup>, Dan Liu<sup>a,b</sup>,*

*Yafei Kuang<sup>\*a,b</sup>*

a State Key Laboratory for Chemo/Biosensing and Chemometrics, Hunan University, Changsha,  
China;

b College of Chemistry and Chemical Engineering, Hunan University, Changsha, China;

\*Corresponding authors: Tel: +86 731 88821863; E-mail address: [yafeik@163.com](mailto:yafeik@163.com) (Yafei Kuang)

Tel: +86 731 88821603; fax: +86 731 88713642; E-mail address: [haihuizh@163.com](mailto:haihuizh@163.com)(Haihui Zhou)

The amount of manganese dioxide in the nanocomposite was measured by EDS, and the result showed that the weight fraction of Mn was 11.29 wt%, representing 16.01 wt% of MnO<sub>2</sub> in the composite.

Table S1 EDS result of the CGNR/PANI/MnO<sub>2</sub> composite

| Element | Wt%   | At%   |
|---------|-------|-------|
| C K     | 75.93 | 86.08 |
| N K     | 2.00  | 1.94  |
| O K     | 10.78 | 9.18  |
| Mn K    | 11.29 | 2.80  |

The MnO<sub>2</sub> fraction in the CGNR/PANI/MnO<sub>2</sub> composite can be altered by adjusting the amount of precursor. When the amount of precursor was halved (termed as sample 1) and doubled (termed as sample 2), the MnO<sub>2</sub> fraction in the CGNR/PANI/MnO<sub>2</sub> composite was decreased and increased respectively. The electrochemical performances of the three samples were evaluated by cyclic voltammetry (CV) and galvanostatic charge–discharge testing. Fig. R4a showed all the three samples displayed analogous rectangle shape, indicating good supercapacitive characteristic. However, when the amount of precursor was halved (sample 1) or doubled (sample 2), the current density reduced, indicating the decrease in the specific capacitance. The galvanostatic charge/discharge curves in Fig. R4b showed similar result, and the optimized MnO<sub>2</sub> fraction sample showed the highest specific capacitance of 496 F g<sup>-1</sup>, comparing to the specific capacitances 351 and 246 F g<sup>-1</sup> for the sample 1 and sample 2 respectively. Therefore, the amount of MnO<sub>2</sub> in the CGNR/PANI/MnO<sub>2</sub> composite was optimized.

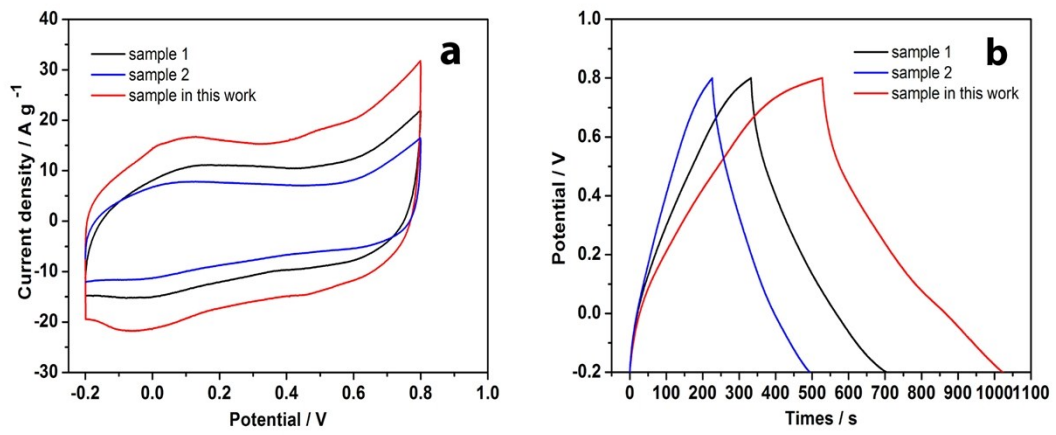

Figure S1 (a) Cyclic voltammograms at a scan rate of  $50 \text{ mV s}^{-1}$  and (b) galvanostatic charge/discharge curves at  $1 \text{ A g}^{-1}$  for the three samples.
